# Supplementary material for: Soybean Stem Canker Caused by Diaporthe caulivora; Pathogen Diversity, Colonization Process, and Plant Defense Activation
Source: Front Plant Sci. 2020 Jan 23;10:1733. doi: 10.3389/fpls.2019.01733 (PMC7011206; doi:10.3389/fpls.2019.01733)
Supplement: Supplementary file 13 [file Table_3.xlsx]

## Sheet: Hoja1
Supplementary Table 3. Primers used in this study.
Gene/loci	Primers	Forward/ Reverse primers	Target sequence *	Ta (°C)+	Amplicon (bp)	Description	Used in
ITS	ITS4	5′ TCCTCCGCTTATTGATATGC 3′	NA	55	600	ITS region of nuclear rDNA	Phylogenetic analyses
	ITS5	5′ GGAAGTAAAAGTCGTAACAAGG 3′
TEF1α	EF1-728F	5′ CATCGAGAAGTTCGAGAAGG 3′	D45837	58	350	translation elongation factor-1-alpha gene	Phylogenetic analyses
	EF1-986R	5′ TACTTGAAGGAACCCTTACC 3′
(GACA)4	(GACA)4	5′ GACAGACAGACAGACA 3′	NA	48	Variable	Inter-Sequence Single Repetition	ISSR-PCR
(GACG)4	(GACG)4	5′ GACGGACGGACGGACG 3′	NA	52	Variable	Inter-Sequence Single Repetition	ISSR-PCR
(ACTG)4	(ACTG)4	5′ ACTGACTGACTGACTG 3′	NA	48	Variable	Inter-Sequence Single Repetition	ISSR-PCR
(GTG)5	(GTG)5	5′ GTGGTGGTGGTGGTG 3′	NA	60	Variable	Inter-Sequence Single Repetition	ISSR-PCR
(AC)8T	(AC)8T	5′ ACACACACACACACACT 3′	NA	50	Variable	Inter-Sequence Single Repetition	ISSR-PCR
(CAG)5	(CAG)5	5′ CAGCAGCAGCAGCAG 3′	NA	52	Variable	Inter-Sequence Single Repetition	ISSR-PCR
PR-1	PR-1	5′ TGATGTTGCCTACGCTCAAG 3′	AF136636	61	137	PR1a precursor	RT-PCR
		5′ AAGCAGCAACCGTATCATCC 3′
PR-2	PR-2	5′ GTCTCCTTCGGTGGTAGTG 3′	M37753	57	104	β-1-3-endoglucanase	RT-PCR
		5′ ACCCTCCTCCTGCTTTCTC 3′
PR-3	PR-3	5′ GCACTTGGTCTGGATTTG 3′	AF202731	53	115	Chitinase	RT-PCR
		5′ GGCTTGATGGCTTGTTTC 3′
PR-4	PR-4	5′ GCTTGCGGGTGACAAATAC 3′	Z11977	57	96	Chitinase	RT-PCR
		5′ ACACTCCCACGTCCAAATC 3′
PR-10	PR-10	5′ GCCCAGGAACCATCAAGAAG 3′	AJ289155	58	108	Stress-induced ribonuclease-like protein	RT-PCR
		5′ CGCTGTAGCTGTATCCCAAG 3′
PR-12	PR-12	5′ CATGGACAAGGCACGATTTGG 3′	BU964598	62	108	Defensin precursor	RT-PCR
		5′ AACCGATGGCTCTTTGACTCAC 3′
PAL	PAL	5′ GTGCAAGGGCTGCTTATG 3′	X52953	57	107	Phenylalanine ammonia-lyase	RT-PCR
		5′ CCCAGTCCCTAATTCCTCTC 3′
CHS	CHS	5′ AGGCTGCAACTAAGGCAATC 3′	X53958	57	103	Chalcone synthase	RT-PCR
		5′ TAATCAGCACCAGGCATGTC 3′
LOX2	LOX2	5′ TGGTTGCGGGTGTAAATC 3′	D13949	59	117	Lipoxygenase 2	RT-PCR
		5′ CAAGGGCATCTGCTGTTATC 3′
LOX7	LOX7	5′ CGCAAGGAATGGGATAGG 3′	U36191	57	117	Lipoxygenase 7	RT-PCR
		5′ GCGAGGGTAAGGTAAGGC 3′
PDF1.2	PDF1.2	5′ CAACCAATGCAAGAACATGG 3′	KR697741.1	60	160	Defensin protein (PDF1.2)	RT-PCR
		5′ CCATGAGTTGCACCTTCCTT 3′
PPO	PPO	5′ GGGTTGGTGCTGCTGATAAG 3′	EF158428	62	100	Polyphenol oxidase	RT-PCR
		5′ CGATCCGAGTTCGTGTGATG 3′
EF-1a	EF-1a	5′ GATTTCATGTAGCCGTAGCC 3′	AK285610.1	55	182	soybean Elongation Factor	RT-PCR and genomic DNA
		5′ ATTTAAGACATCCCTCCTCAG 3′
β-TUB	DPM β-TUB	5′ CCGTGGAAAGGTCTCTATGAAG 3′	AY780115	58	101	Diaporthe phaseolorum β-tubulin	genomic DNA
		5′ TCTGGACGTTGTTGGGAATC 3′
*NCBI accession number of genes
+Primer annealing temperature.
NA: Not applicable
