# Supplementary material for: Soybean Stem Canker Caused by Diaporthe caulivora; Pathogen Diversity, Colonization Process, and Plant Defense Activation
Source: Front Plant Sci. 2020 Jan 23;10:1733. doi: 10.3389/fpls.2019.01733 (PMC7011206; doi:10.3389/fpls.2019.01733)
Supplement: Supplementary file 14 [file Table_4.xlsx]

## Sheet: Hoja1
Supplementary Table 4. List of the cis-regulatory elements identified upstream of the defense genes.
Gene name	PR-1	PR-2	PR-3	PR-4	PR-10	PAL	CHS	LOX2	LOX7	PDF1.2	IPER	Total number of genes containing the promoter element
A-box				+								1
AAGAA-motif	+	+	+					+				4
ABRE	+		+	+	+	+	+	+		+	+	9
AC-I						+	+					2
ACE							+					1
AE-box							+					1
ARE	+				+	+	+	+	+	+	+	8
as-1-box	+		+	+	+		+	+	+		+	8
AT-rich sequence		+			+							2
ATC-motif										+		1
AT~TATA-box	+	+	+	+	+	+	+	+	+	+	+	11
AuxRR-core									+			1
Box II					+	+						2
Box III			+									1
Box 4	+	+	+	+	+	+	+	+	+	+	+	11
CAAT-box	+	+	+	+	+	+	+	+	+	+	+	11
CARE					+							1
CAT-box		+							+			2
CCAAT-box										+		1
CCGTCC motif				+								1
CGTCA-motif	+		+	+	+		+	+	+		+	8
circadian						+				+		2
CTAG-motif										+		1
DRE					+						+	2
ERE	+	+			+	+	+		+			6
F-box				+								1
G-box	+		+	+	+	+	+	+	+	+	+	10
GA-motif				+			+					2
Gap-box					+							1
GARE-motif			+						+		+	3
GATA-motif							+	+	+	+		4
GCN4_motif					+	+						2
GT1-motif	+	+			+			+		+		5
I-box			+						+			2
LAMP-element										+		1
LTR						+		+				2
MBS	+	+								+		3
MRE							+					1
MSA									+			1
Myb	+	+	+		+			+	+	+		7
MYB	+	+	+		+			+	+	+	+	8
MYC	+	+	+		+	+	+	+	+	+	+	10
O2-site			+				+	+			+	4
P-box									+			1
plant_AP-2-like											+	1
re2f-1		+										1
RY-element	+											1
Sp1				+							+	2
STRE		+		+	+	+	+			+		6
TATA-box	+	+	+	+	+	+	+	+	+	+	+	11
TATC-box	+					+						2
TC-rich repeats								+				1
TCA-element			+	+			+			+		4
TCT-motif	+	+		+		+			+			5
TGACG-motif	+		+	+	+		+	+	+		+	8
TGA-element			+								+	2
Unnamed__1			+	+		+	+		+	+	+	7
Unnamed__2										+		1
Unnamed__4	+	+	+	+	+	+	+	+	+	+	+	11
Unnamed__6	+		+	+		+		+		+		6
W box	+			+		+		+			+	5
WRE3	+						+					1
WUN-motif			+	+		+	+			+	+	6
Cis Regulatory Element		Description
A-box		sequence conserved in alpha-amylase promoters
AAGAA-motif		not defined
ABRE		cis-acting element involved in the abscisic acid responsiveness
AC-I		element involved in negative regulation on phloem expression
ACE		cis-acting element involved in light responsiveness
AE-box		part of a module for light response
ARE		cis-acting regulatory element essential for the anaerobic induction
as-1-box		involved in shoot-specific expression and light responsiveness
AT-rich sequence		element for maximal elicitor-mediated activation
ATC-motif		part of a conserved DNA module involved in light responsiveness
AT~TATA-box		not defined
AuxRR-core		cis-acting regulatory element involved in auxin responsiveness
Box II		part of a light responsive element
Box III		protein binding site
Box 4		part of a conserved DNA module involved in light responsiveness
CAAT-box		common cis-acting element in promoter and enhancer regions
CARE		not defined
CAT-box		cis-acting regulatory element related to meristem expression
CCAAT-box		MYBHv1 binding site
CCGTCC-motif		cis-acting regulatory element related to meristem specific activation
CGTCA-motif		cis-acting regulatory element involved in the MeJA-responsiveness
circadian		cis-acting regulatory element involved in circadian control
CTAG-motif		not defined
DRE		cis-acting element involved in dehydration, low-temp, salt stresses
ERE		ethylene-responsive element
F-box		not defined
G-box		cis-acting regulatory element involved in light responsiveness
GA-motif		part of a light responsive element
Gap-box		part of a light responsive element
GARE-motif		gibberellin-responsive element
GATA-motif		part of a light responsive element
GCN4_motif		cis-regulatory element involved in endosperm expression
GT1-motif		light responsive element
I-box		part of a light responsive element
LAMP-element		part of a light responsive element
LTR		cis-acting element involved in low-temperature responsiveness
MBS		MYB binding site involved in drought-inducibility
MRE		MYB binding site involved in light responsiveness
MSA		cis-acting element involved in cell cycle regulation
Myb		not defined
MYB		not defined
MYC		not defined
O2-site		cis-acting regulatory element involved in zein metabolism regulation
P-box		gibberellin-responsive element
plant_AP-2-like		not defined
re2f-1		not defined
RY-element		cis-acting regulatory element involved in seed-specific regulation
Sp1		light responsive element
STRE		not defined
TATA-box		core promoter element around -30 of transcription start
TATC-box		cis-acting element involved in gibberellin-responsiveness
TC-rich repeats		cis-acting element involved in defense and stress responsiveness
TCA-element		cis-acting element involved in salicylic acid responsiveness
TCT-motif		part of a light responsive element
TGACG-motif		cis-acting regulatory element involved in the MeJA-responsiveness
TGA-element		auxin-responsive element
Unnamed__1		not defined
Unnamed__2		not defined
Unnamed__4		not defined
Unnamed__6		not defined
W box		wounding and pathogen responsiveness. Binds WRKY type transcription factors
WRE3		not defined
WUN-motif		wound-responsive element
